# Supplementary material for: Potential rules for stable transition metal hexafluorides with high oxidation states under high pressures
Source: Royal Society of Chemistry journal article supplement (doi:10.1039/d2cp05418c), 2023-01-01
Supplement: d2cp05418c1.pdf [file d2cp05418c1.pdf]

## Supplementary Information

### Potential Rules for Stable Transition Metal Hexafluoride with High Oxidation State Under Pressures

Shiyin Ma,<sup>†#</sup> Liang Zhao,<sup>†#</sup> Shichang Li,<sup>‡</sup> Tao Gao<sup>\*†</sup> and Feng Peng<sup>\*‡</sup>

<sup>†</sup>Institute of Atomic and Molecular Physics, Sichuan University, Chengdu 610065, China

<sup>‡</sup>College of Physics and Electronic Information, Luoyang Normal University, Luoyang 471934, China

<sup>‡</sup>School of Science, Chongqing University of Posts and Telecommunications, Chongqing 400065, China

\*Email of corresponding author: gaotao@scu.edu.cn(T. G.); and fpeng@calypso.cn (F. P.).

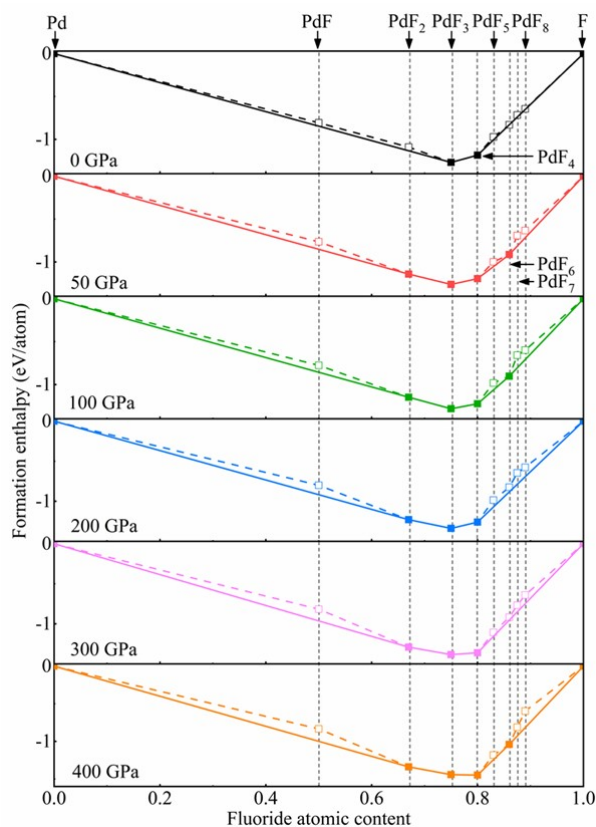

**Fig. S1** Convex hulls of the Pd-F system with respect to solid Pd and F at selected pressures. Solid points connected by a solid line denote thermodynamically stable phases, while empty points connected by a dotted line represent unstable/metastable structures.

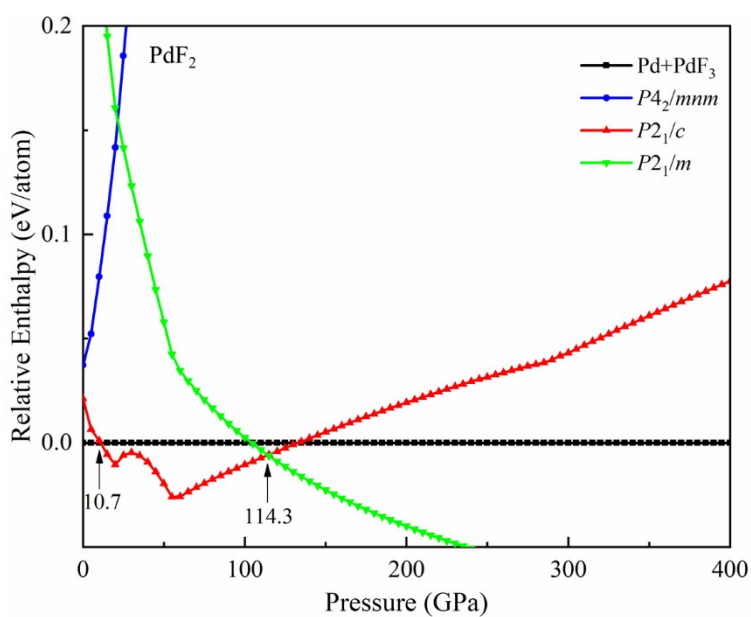

**Fig. S2** Enthalpies of various predicted  $\text{PdF}_2$  phases with respect to Pd and  $\text{PdF}_3$  as a function of pressures.

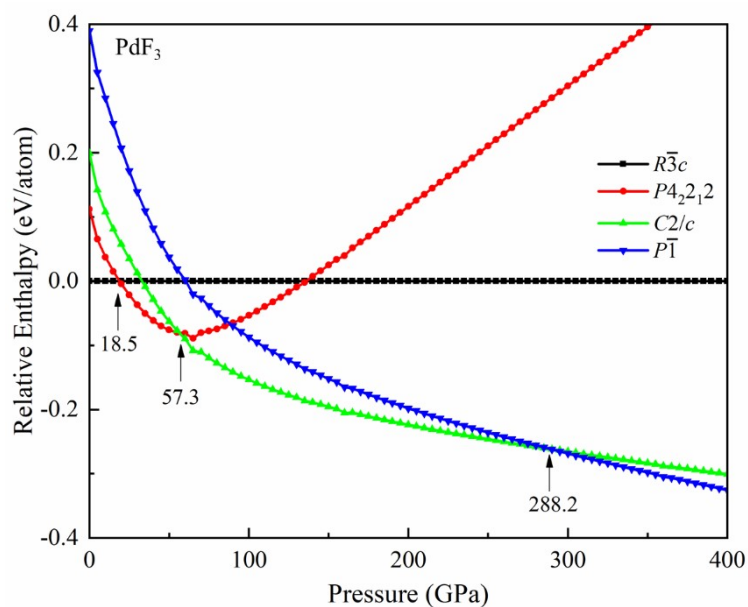

**Fig. S3** Enthalpies (relative to  $R\bar{3}c$  phase) of various predicted  $\text{PdF}_3$  phases as a function of pressures.

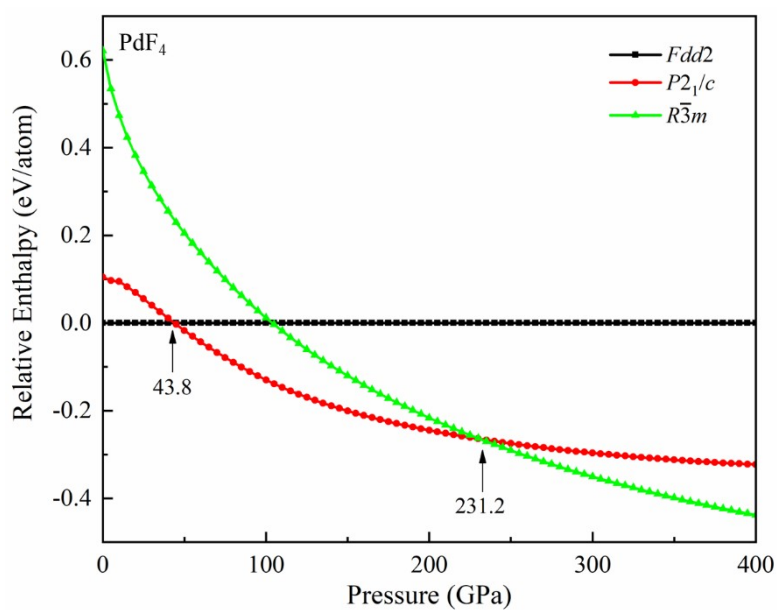

**Fig. S4** Enthalpies (relative to  $Fdd2$  phase) of various predicted  $\text{PdF}_4$  phases as a function of pressures.

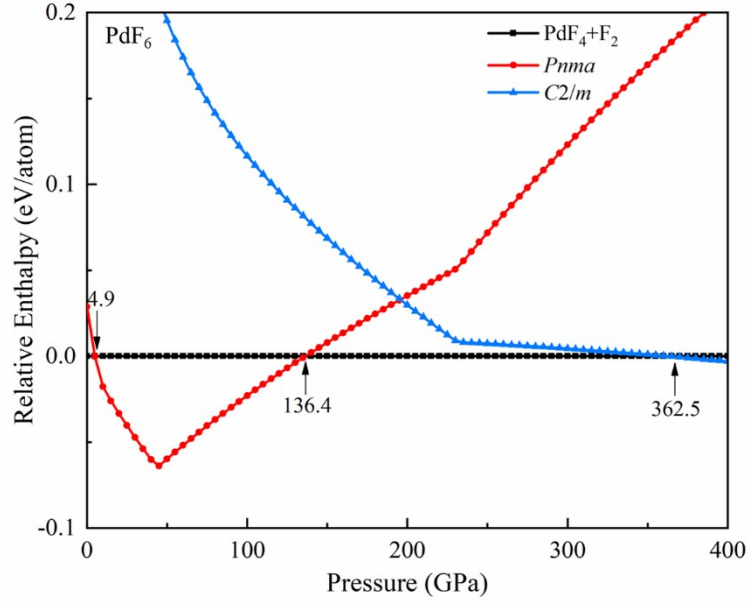

**Fig. S5** Enthalpies of various predicted  $\text{PdF}_6$  phases with respect to  $\text{PdF}_4$  and  $\text{F}_2$  as a function of pressures using PBE functional.

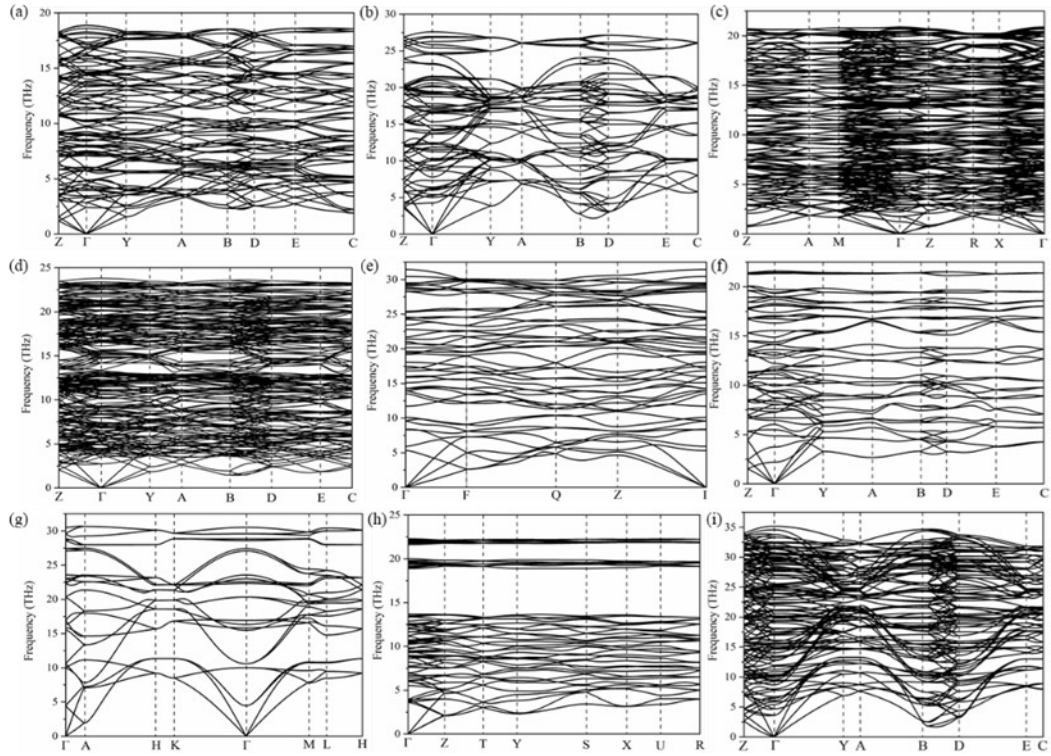

**Fig. S6** Phonon dispersion curves of the predicted Pd-F binary compounds. (a)  $P2_1/c$   $\text{PdF}_2$  at 50 GPa. (b)  $P2_1/m$   $\text{PdF}_2$  at 200 GPa. (c)  $P4_22_12$   $\text{PdF}_3$  at 50 GPa. (d)  $C2/c$   $\text{PdF}_3$  at 100 GPa. (e)  $P\bar{1}$   $\text{PdF}_3$  at 300 GPa. (f)  $P2_1/c$   $\text{PdF}_4$  at 50 GPa. (g)  $R\bar{3}m$   $\text{PdF}_4$  at 300 GPa. (h)  $Pnma$   $\text{PdF}_6$  at 50 GPa. (i)  $C2/m$   $\text{PdF}_6$  at 50 GPa.

400 GPa.

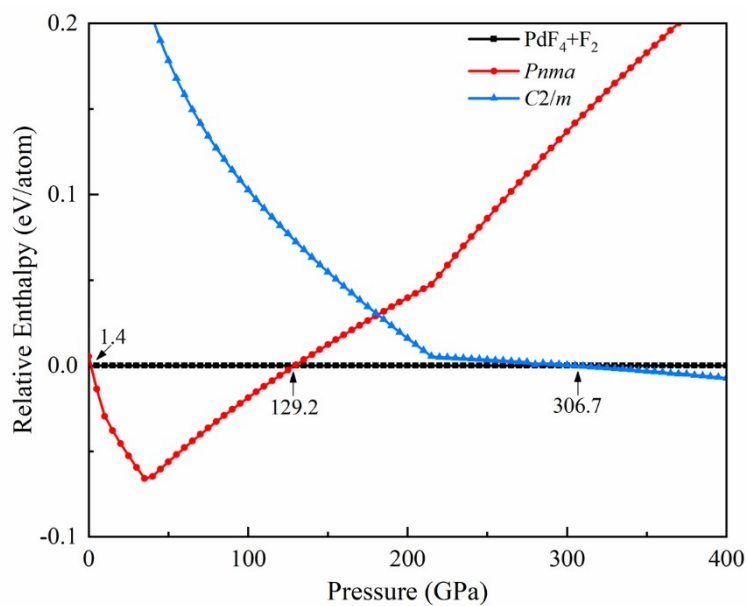

**Fig. S7** Enthalpies of various predicted PdF<sub>6</sub> phases with respect to PdF<sub>4</sub> and F<sub>2</sub> as a function of pressures using optB88-vdW functional.<sup>1-2</sup>

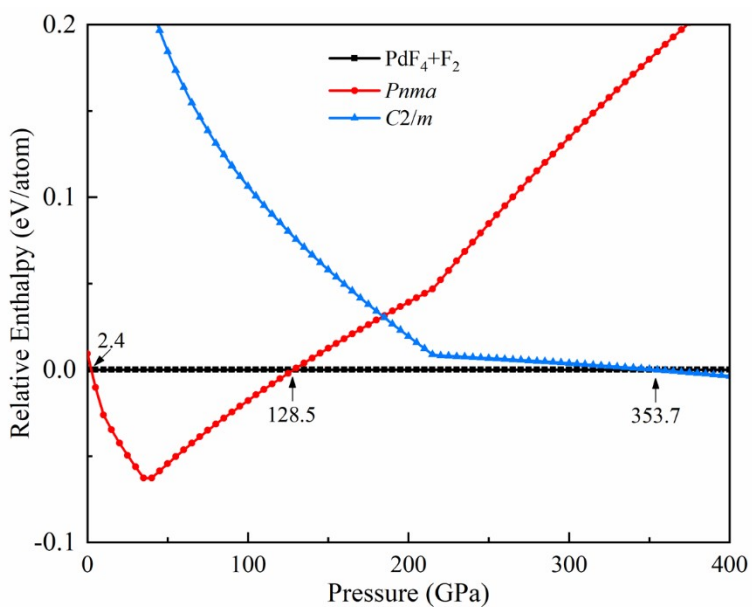

**Fig. S8** Enthalpies of various predicted PdF<sub>6</sub> phases with respect to PdF<sub>4</sub> and F<sub>2</sub> as a function of pressures using optPBE-vdW functional.<sup>1-2</sup>

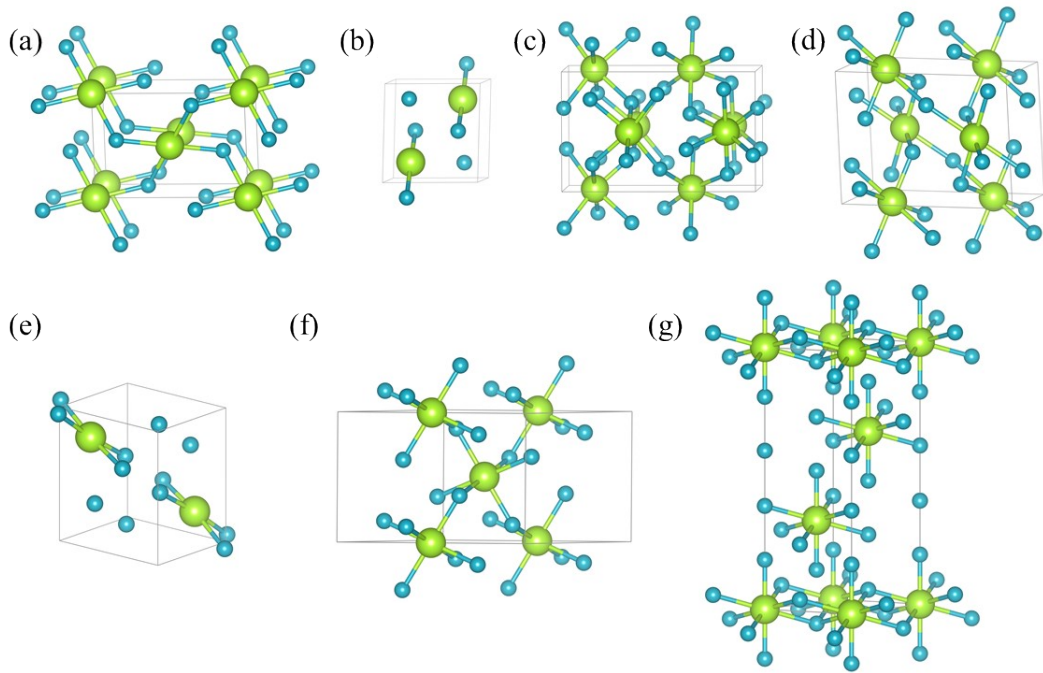

**Fig. S9** Crystalline structures of the predicted stable Pd-F phases. (a)  $P2_1/c$  structure of  $\text{PdF}_2$  at 50 GPa. (b)  $P2_1/m$  structure of  $\text{PdF}_2$  at 200 GPa. (c)  $P4_22_12$  structure of  $\text{PdF}_3$  at 50 GPa. (d)  $C2/c$  structure of  $\text{PdF}_3$  at 100 GPa. (e)  $P\bar{1}$  structure of  $\text{PdF}_3$  at 300 GPa. (f)  $P2_1/c$  structure of  $\text{PdF}_4$  at 50 GPa. (g)  $R\bar{3}m$  structure of  $\text{PdF}_4$  at 300 GPa.

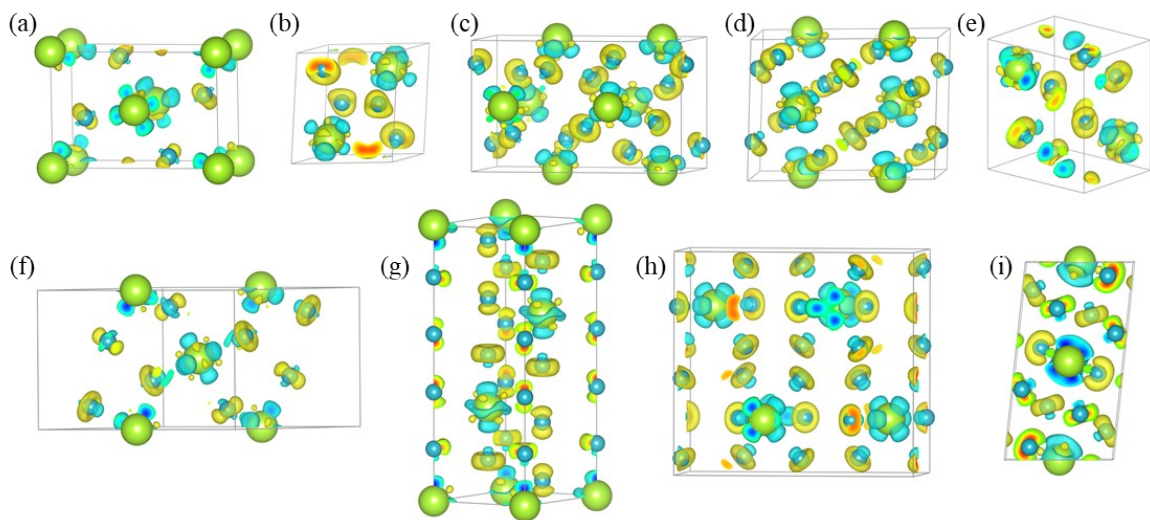

**Fig. S10** Three-dimensional charge density difference for (a)  $P2_1/c$   $\text{PdF}_2$  at 50 GPa; (b)  $P2_1/m$   $\text{PdF}_2$  at 200 GPa; (c)  $P4_22_12$   $\text{PdF}_3$  at 50 GPa; (d)  $C2/c$   $\text{PdF}_3$  at 100 GPa; (e)  $P\bar{1}$   $\text{PdF}_3$  at 300 GPa; (f)  $P2_1/c$   $\text{PdF}_4$  at 50 GPa; (g)  $R\bar{3}m$   $\text{PdF}_4$  at 300 GPa; (h)  $Pnma$   $\text{PdF}_6$  at 50 GPa and (i)  $C2/m$   $\text{PdF}_6$  at 400 GPa with an



isosurface value of  $0.03 e/\text{Bohr}^3$ . Blue and yellow colors represent losing and gaining electrons, respectively.

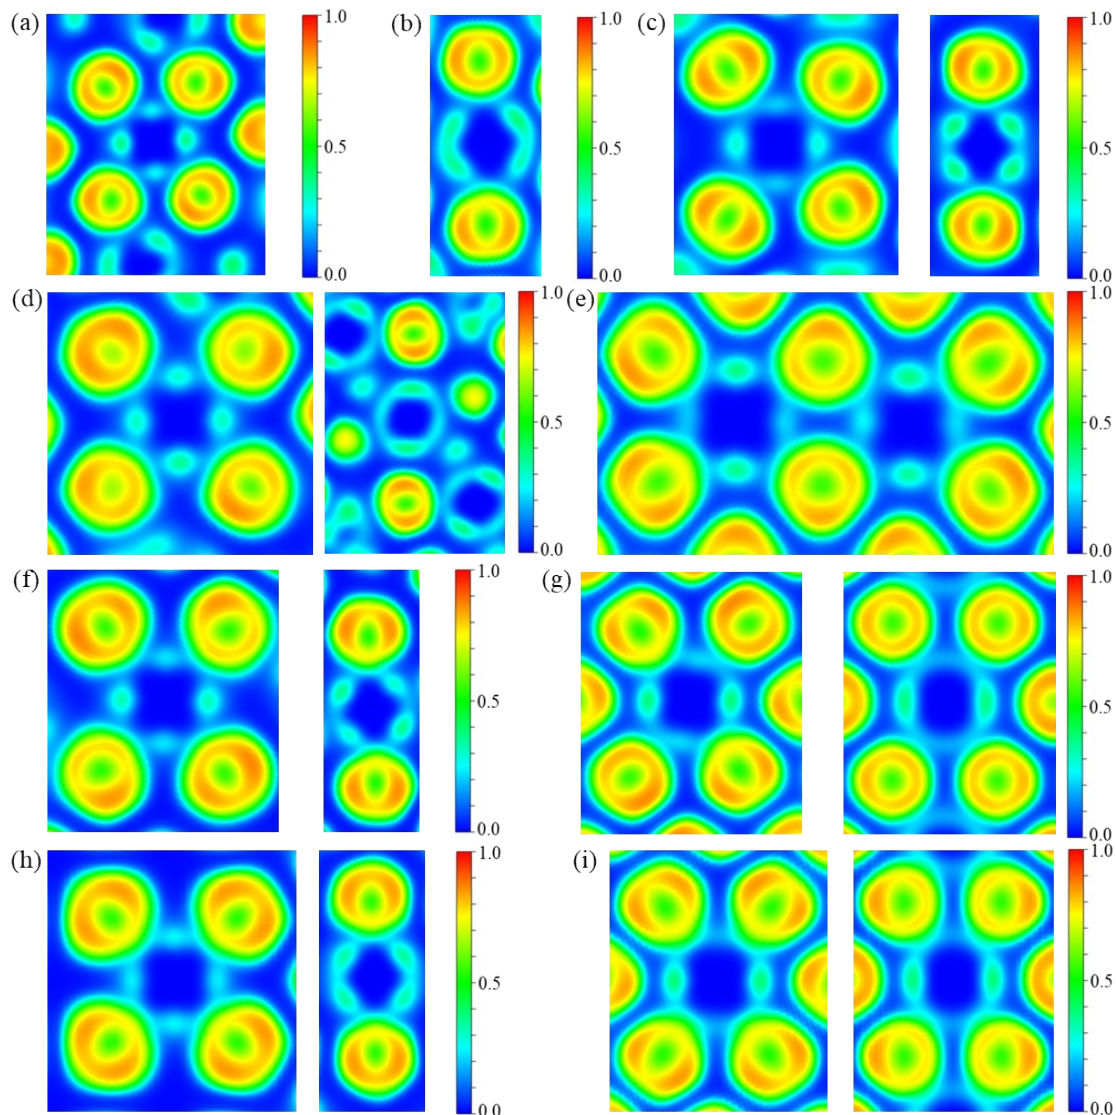

**Fig. S11** Electron function localization (ELF) maps for (a)  $P2_1/c$  PdF<sub>2</sub> on the (1.78132, -1.51638, 1) plane at 50 GPa; (b)  $P2_1/m$  PdF<sub>2</sub> on the (0, 1, 0) plane at 200 GPa; (c)  $P4_22_12$  PdF<sub>3</sub> on the (1, 1.78629, 0) and (2.6609, 1, 2309.73) plane at 50 GPa; (d)  $C2/c$  PdF<sub>3</sub> on the (4.90199, 1.75107, -1) and (-1, -1.9651, 1.9651) plane at 100 GPa; (e)  $P\bar{1}$  PdF<sub>3</sub> on the (1, -1.0398, -2.03364) plane at 300 GPa; (f)  $P2_1/c$  PdF<sub>4</sub> on the (-4.46078, -2.16113, 1) and (-1, -2.212, 0) plane at 50 GPa; (g)  $R\bar{3}m$  PdF<sub>4</sub> on the (-1, 2, 0) and (-1, 0, 5.44173) plane at 300 GPa; (h)  $Pnma$  PdF<sub>6</sub> on the (1.21664, 0, -1) and (0, 1, 0) plane at 50 GPa; (i)  $C2/m$  PdF<sub>6</sub> on the (0, 1, 0) and (4.24799, 0, 1) plane at 400 GPa.

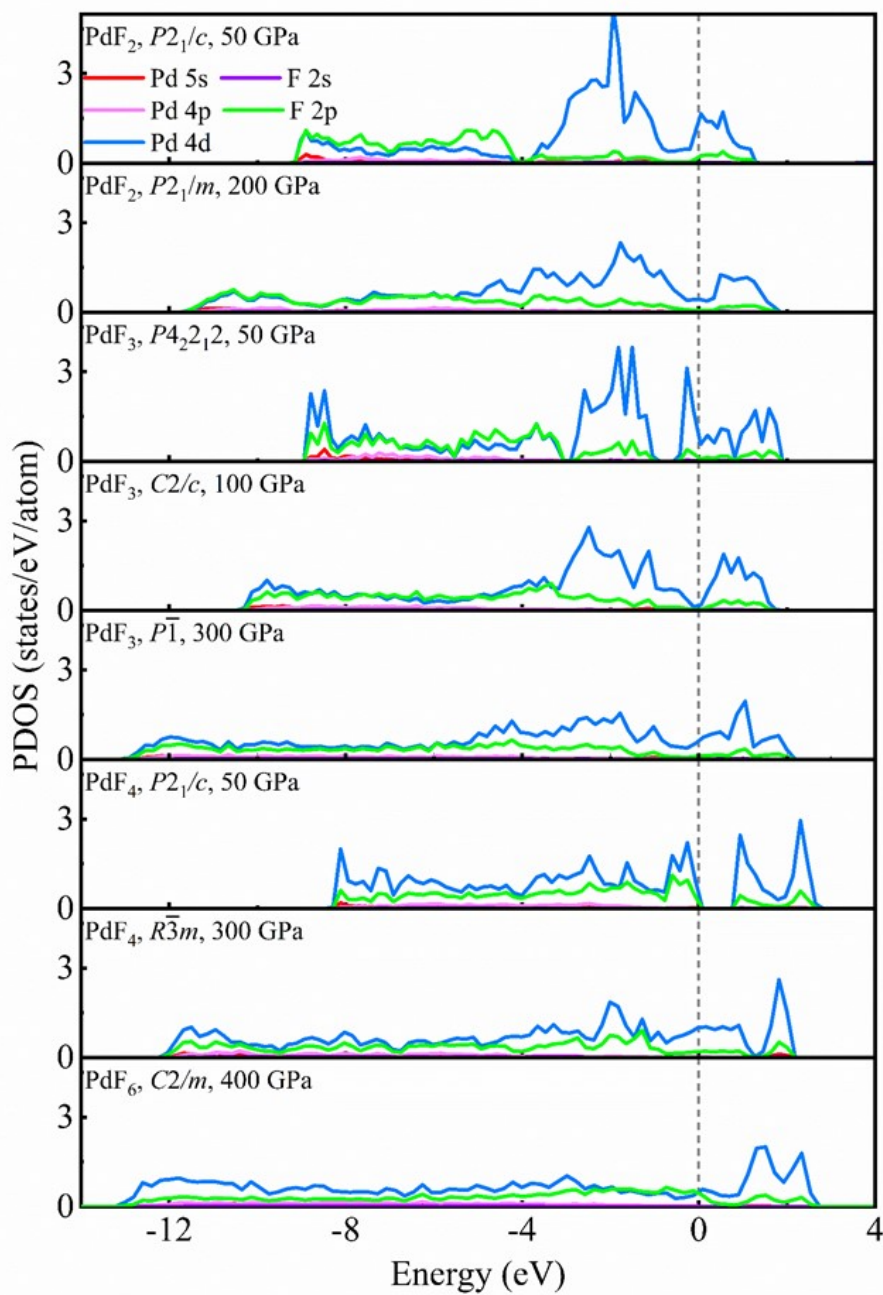

**Fig. S12** Projected density of states (PDOS) of the stable Pd-F compounds at selected pressures. Energy is shifted so that the Fermi level  $E_F$  equals zero.



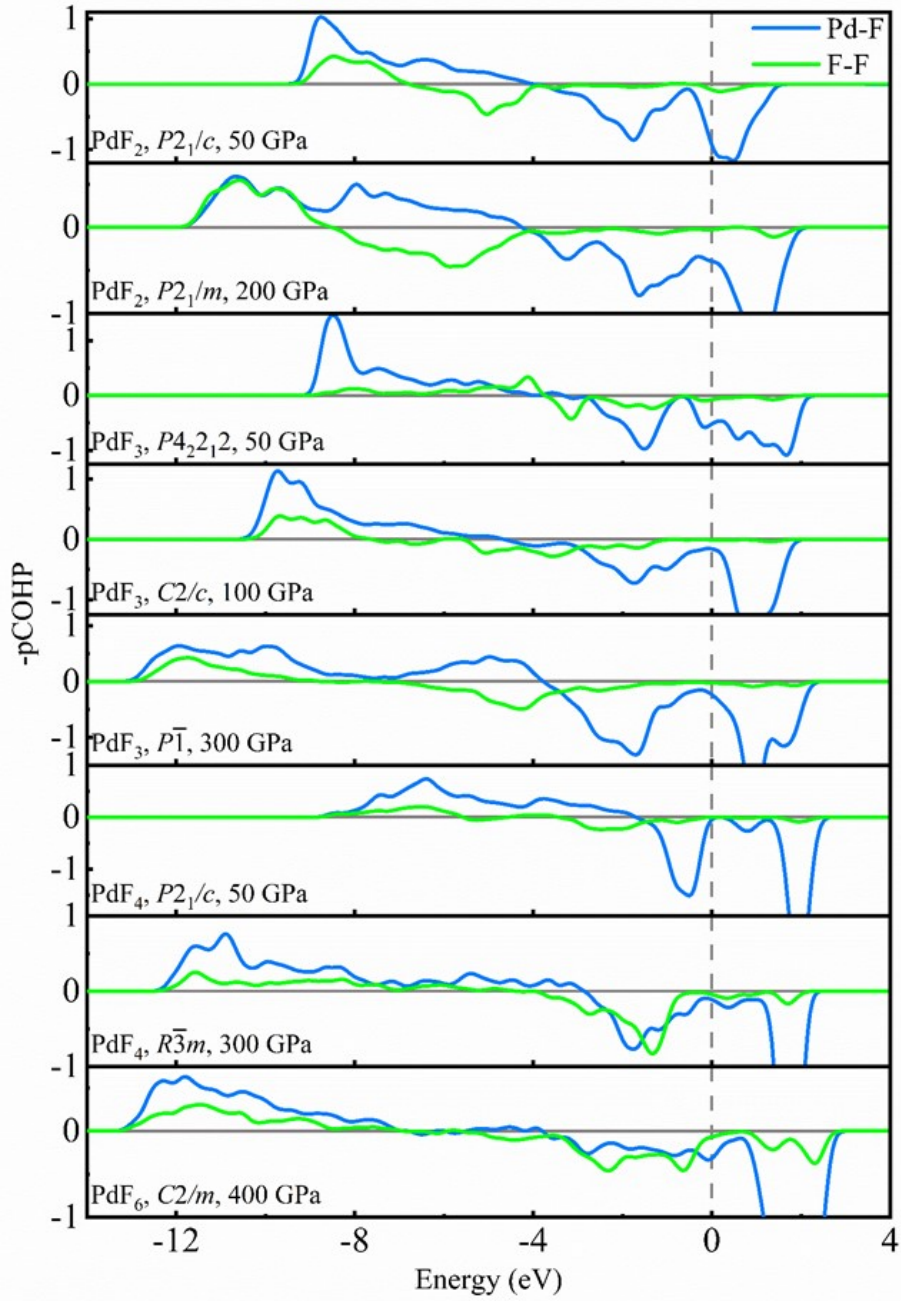

**Fig. S13** Crystal orbital Hamilton populations (COHP) for the nearest Pd-F and F-F pairs of the stable Pd-F compounds at selected pressures. Positive and negative denote bonding and antibonding orbital interactions, respectively. Energy is shifted so that the Fermi level  $E_F$  equals zero.

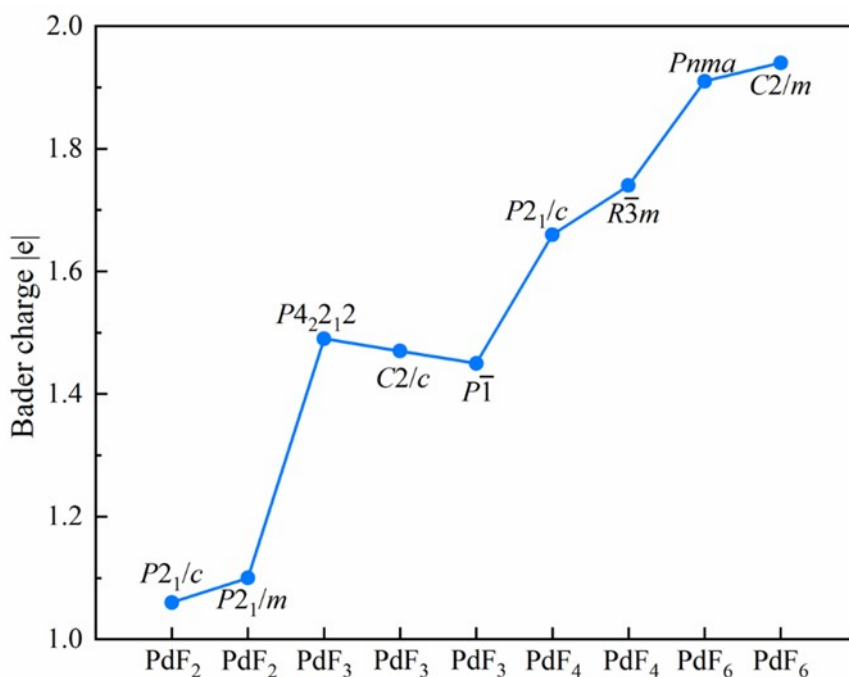

**Fig. S14** Bader charge transfer of Pd atom in the stable Pd-F compounds.

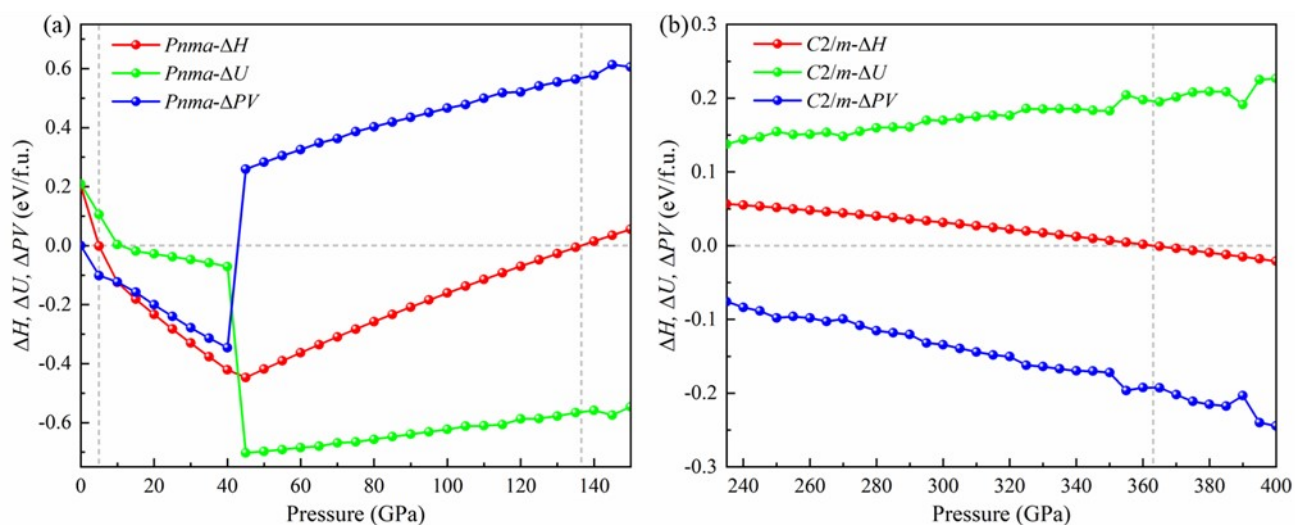

**Fig. S15** Relationship between  $\Delta H$ ,  $\Delta U$ , and  $\Delta PV$  with pressure of (a) *Pnma* PdF<sub>6</sub> and (b) *C2/m* PdF<sub>6</sub> with respect to PdF<sub>4</sub> plus F<sub>2</sub>. The changes of enthalpy ( $\Delta H$ ), internal energy ( $\Delta U$ ), and ( $\Delta PV$ ) are defined as  $\Delta H = H(\text{PdF}_6) - (H(\text{PdF}_4) + H(\text{F}_2))$ ,  $\Delta U = U(\text{PdF}_6) - (U(\text{PdF}_4) + U(\text{F}_2))$ ,  $\Delta PV = PV(\text{PdF}_6) - (PV(\text{PdF}_4) + PV(\text{F}_2))$ , respectively.

**Table S1.** Calculated structural parameters of the predicted stable TM-F compounds.

|                               | Space<br>group                      | Lattice<br>Parameters<br>(Å, °)       | Atoms   | Atomic coordinates<br>(fractional) |         |         |
|-------------------------------|-------------------------------------|---------------------------------------|---------|------------------------------------|---------|---------|
|                               |                                     |                                       |         | X                                  | Y       | Z       |
| PdF <sub>2</sub><br>(50 GPa)  | <i>P2<sub>1</sub>/c</i>             | a=2.57850                             | Pd (2a) | 0.00000                            | 0.50000 | 0.50000 |
|                               |                                     | b=3.81920                             | F (4e)  | 0.74248                            | 0.91487 | 0.32964 |
|                               |                                     | c=5.58190                             |         |                                    |         |         |
|                               |                                     | α=γ=90.0000<br>β=88.5446              |         |                                    |         |         |
| PdF <sub>2</sub><br>(200 GPa) | <i>P2<sub>1</sub>/m</i>             | a=3.37130                             | Pd (2e) | 0.36848                            | 0.75000 | 0.19062 |
|                               |                                     | b=3.43570                             | F1 (2e) | 0.72219                            | 0.75000 | 0.49336 |
|                               |                                     | c=3.67800                             | F3 (2e) | 0.92419                            | 0.25000 | 0.15656 |
|                               |                                     | α=γ=90.0000<br>β=73.1054              |         |                                    |         |         |
| PdF <sub>3</sub><br>(50 GPa)  | <i>P4<sub>2</sub>2<sub>1</sub>2</i> | a=b= 4.44900                          | Pd (4d) | 0.50000                            | 0.00000 | 1.15186 |
|                               |                                     | c=7.21520                             | F1 (8g) | 0.13477                            | 0.22240 | 1.15347 |
|                               |                                     | α=β=γ=90.0000                         | F9 (4f) | 0.17945                            | 0.17945 | 0.50000 |
| PdF <sub>3</sub><br>(100 GPa) | <i>C2/c</i>                         | a=6.25010                             | Pd (4c) | 0.25000                            | 0.25000 | 1.00000 |
|                               |                                     | b=4.07430                             | F1 (8f) | 0.36298                            | 0.64277 | 0.86606 |
|                               |                                     | c=4.71700                             | F9 (4e) | 0.50000                            | 0.87278 | 1.25000 |
|                               |                                     | α=γ=90.0000<br>β=92.4330              |         |                                    |         |         |
| PdF <sub>3</sub><br>(300 GPa) | <i>P<math>\bar{1}</math></i>        | a=3.28680                             | Pd (2i) | 0.87218                            | 0.22896 | 0.79331 |
|                               |                                     | b=3.53610                             | F1 (2i) | 0.39081                            | 0.24675 | 0.57084 |
|                               |                                     | c=4.52870                             | F3 (2i) | 0.88834                            | 0.28246 | 0.30974 |
|                               |                                     | α=100.6174<br>β=97.2066<br>γ=113.7740 | F7 (2i) | 0.64267                            | 0.76473 | 0.94673 |
|                               |                                     |                                       |         |                                    |         |         |
| PdF <sub>4</sub><br>(50 GPa)  | <i>P2<sub>1</sub>/c</i>             | a=6.48130                             | Pd (2d) | 0.50000                            | 0.00000 | 0.50000 |
|                               |                                     | b=4.49200                             | F1 (4e) | 0.30491                            | 0.86568 | 0.92003 |

|                               |                               |                               |          |          |         |         |
|-------------------------------|-------------------------------|-------------------------------|----------|----------|---------|---------|
|                               |                               | c=4.54160                     | F5 (4e)  | 0.85507  | 0.66052 | 1.18750 |
|                               |                               | $\alpha=\gamma=90.0000$       |          |          |         |         |
|                               |                               | $\beta=141.0896$              |          |          |         |         |
| PdF <sub>4</sub><br>(300 GPa) | <i>R<math>\bar{3}</math>m</i> | a=b=3.19650                   | Pd (3a)  | 0.00000  | 0.00000 | 0.00000 |
|                               |                               | c=9.29580                     | F1 (6c)  | 0.33333  | 0.66667 | 0.85564 |
|                               |                               | $\alpha=\beta=90.0000$        | F7 (6c)  | 0.00000  | 0.00000 | 0.60541 |
|                               |                               | $\gamma=120.0000$             |          |          |         |         |
| PdF <sub>6</sub><br>(50 GPa)  | <i>Pnma</i>                   | a=7.75110                     | Pd (4c)  | 0.62909  | 0.75000 | 0.42417 |
|                               |                               | b=7.15950                     | F1 (8d)  | 0.76873  | 0.92899 | 0.59784 |
|                               |                               | c=4.12080                     | F9 (8d)  | 1.48619  | 0.57166 | 0.25409 |
|                               |                               | $\alpha=\beta=\gamma=90.0000$ | F17 (4c) | 1.23838  | 0.25000 | 0.94347 |
|                               |                               |                               | F21 (4c) | 1.49869  | 0.25000 | 0.20390 |
| PdF <sub>6</sub><br>(400 GPa) | <i>C2/m</i>                   | a=6.41910                     | Pd (2d)  | 0.00000  | 0.50000 | 0.50000 |
|                               |                               | b=3.04890                     | F1 (4i)  | 0.93427  | 0.00000 | 0.77922 |
|                               |                               | c=3.50030                     | F5 (4i)  | 0.76690  | 0.00000 | 0.34187 |
|                               |                               | $\alpha=\gamma=90.0000$       | F9 (4i)  | 0.64181  | 0.00000 | 0.90677 |
|                               |                               | $\beta=83.9461$               |          |          |         |         |
| CoF <sub>6</sub><br>(200 GPa) | <i>Pnma</i>                   | a=6.80090                     | Co (4c)  | 0.63064  | 0.75000 | 0.42682 |
|                               |                               | b=6.32760                     | F1 (4c)  | 0.23434  | 0.25000 | 0.94422 |
|                               |                               | c=3.63240                     | F5 (8d)  | 0.77071  | 0.93167 | 0.60482 |
|                               |                               | $\alpha=\beta=\gamma=90.0000$ | F9 (8d)  | 0.48415  | 0.56973 | 0.25708 |
|                               |                               |                               | F21 (4c) | 0.49709  | 0.25000 | 0.19343 |
| CrF <sub>6</sub><br>(200 GPa) | <i>Pnma</i>                   | a=6.91630                     | Cr (4c)  | 0.12798  | 0.75000 | 0.42095 |
|                               |                               | b=6.37400                     | F1 (4c)  | -0.26523 | 0.25000 | 0.94312 |
|                               |                               | c=3.66670                     | F5 (8d)  | 0.26664  | 0.93059 | 0.59996 |
|                               |                               | $\alpha=\beta=\gamma=90.0000$ | F9 (8d)  | -0.01474 | 0.56905 | 0.25111 |
|                               |                               |                               | F21 (4c) | 0.00148  | 0.25000 | 0.20390 |
| HfF <sub>6</sub><br>(200 GPa) | <i>Pnma</i>                   | a=7.67010                     | Hf (4c)  | 0.15008  | 0.75000 | 0.46004 |
|                               |                               | b=6.60180                     | F1 (4c)  | -0.30420 | 0.25000 | 0.98733 |

|                  |             |                               |          |          |          |         |
|------------------|-------------|-------------------------------|----------|----------|----------|---------|
|                  |             | c=3.32130                     | F5 (8d)  | 0.31835  | 0.96650  | 0.60367 |
|                  |             | $\alpha=\beta=\gamma=90.0000$ | F9 (8d)  | -0.05811 | 0.51436  | 0.31216 |
|                  |             |                               | F21 (4c) | -0.01585 | 0.25000  | 0.03093 |
| MnF <sub>6</sub> | <i>Pnma</i> | a=6.88760                     | Mn (4c)  | 0.62864  | 0.75000  | 0.42251 |
| (200 GPa)        |             | b=6.35520                     | F1 (4c)  | 0.23331  | 0.25000  | 0.94165 |
|                  |             | c=3.64300                     | F5 (8d)  | 0.76849  | 0.93060  | 0.60129 |
|                  |             | $\alpha=\beta=\gamma=90.0000$ | F9 (8d)  | 0.48489  | 0.56860  | 0.25417 |
|                  |             |                               | F21 (4c) | 0.49953  | 0.25000  | 0.19881 |
| YF <sub>6</sub>  | <i>Pnma</i> | a=6.40450                     | Y (4c)   | 1.16541  | 0.75000  | 0.49833 |
| (200 GPa)        |             | b=7.06350                     | F1 (4c)  | 0.66572  | 0.25000  | 0.00008 |
|                  |             | c=3.77180                     | F5 (8d)  | 1.31185  | -0.00163 | 0.71373 |
|                  |             | $\alpha=\beta=\gamma=90.0000$ | F9 (8d)  | 0.94064  | 0.50236  | 0.25932 |
|                  |             |                               | F21 (4c) | 0.99855  | 0.25000  | 0.00350 |

**Table S2.** Calculated Bader charge analysis of the stable Pd-F compounds.  $\Delta Q$  is the charge transfer in e per atom. The number in parentheses is the Wyckoff sites corresponding to the atoms.

| Phase                                                | Pressure (GPa) | Q (Pd/e)  | $\Delta Q$ (Pd/e) | Q (F/e)   | $\Delta Q$ (F/e) |
|------------------------------------------------------|----------------|-----------|-------------------|-----------|------------------|
| <i>P2<sub>1</sub>/c</i> PdF <sub>2</sub>             | 50             | 8.94 (2a) | -1.06             | 7.53 (4e) | +0.53 (F1)       |
| <i>P2<sub>1</sub>/m</i> PdF <sub>2</sub>             | 200            | 8.90 (2e) | -1.10             | 7.53 (2e) | +0.53 (F1)       |
|                                                      |                |           |                   | 7.57 (2e) | +0.57 (F3)       |
| <i>P4<sub>2</sub>2<sub>1</sub>2</i> PdF <sub>3</sub> | 50             | 8.51 (4d) | -1.49             | 7.49 (8g) | +0.49 (F1)       |
|                                                      |                |           |                   | 7.51 (4f) | +0.51 (F9)       |
| <i>C2/c</i> PdF <sub>3</sub>                         | 100            | 8.53 (4c) | -1.47             | 7.46 (8f) | +0.46 (F1)       |
|                                                      |                |           |                   | 7.55 (4e) | +0.55 (F9)       |
| <i>P<math>\bar{1}</math></i> PdF <sub>3</sub>        | 300            | 8.55 (2i) | -1.45             | 7.45 (2i) | +0.45 (F1)       |
|                                                      |                |           |                   | 7.51 (2i) | +0.51 (F3)       |
|                                                      |                |           |                   | 7.49 (2i) | +0.49 (F7)       |



|                              |     |           |       |           |             |
|------------------------------|-----|-----------|-------|-----------|-------------|
| $P2_1/c$ PdF <sub>4</sub>    | 50  | 8.34 (2d) | -1.66 | 7.38 (4e) | +0.38 (F1)  |
|                              |     |           |       | 7.45 (4e) | +0.45 (F5)  |
| $R\bar{3}m$ PdF <sub>4</sub> | 300 | 8.26 (3a) | -1.74 | 7.46 (6c) | +0.46 (F1)  |
|                              |     |           |       | 7.41 (6c) | +0.41 (F7)  |
| $Pnma$ PdF <sub>6</sub>      | 50  | 8.09 (4c) | -1.91 | 7.32 (8d) | +0.32 (F1)  |
|                              |     |           |       | 7.31 (8d) | +0.31 (F9)  |
|                              |     |           |       | 7.33 (4c) | +0.33 (F17) |
|                              |     |           |       | 7.32 (4c) | +0.32 (F21) |
| $C2/m$ PdF <sub>6</sub>      | 400 | 8.06 (2d) | -1.94 | 7.33 (4i) | +0.33 (F1)  |
|                              |     |           |       | 7.34 (4i) | +0.34 (F5)  |
|                              |     |           |       | 7.30 (4i) | +0.30 (F9)  |

## References

1. J. Klimeš, D. R. Bowler and A. Michaelides, *J. Phys-Condens. Mat.*, 2009, **22**, 022201.
2. T. Thonhauser, V. R. Cooper, S. Li, A. Puzder, P. Hyldgaard and D. C. Langreth, *Phys. Rev. B*, 2007, **76**, 125112.
